- ious stimuli during isoflurane or sevoflurane anesthesia. *ANESTHESIOLOGY* 2004; 100:818-25
17. Flaishon R, Windsor A, Sigl J, Sebel PS: Recovery of consciousness after thiopental or propofol. Bispectral index and the isolated forearm technique. *ANESTHESIOLOGY* 1997; 86:613-9
  18. Kosaka Y, Takahashi T, Mark LC: Intravenous thiobarbiturate anesthesia for cesarean section. *ANESTHESIOLOGY* 1969; 31:613-9
  19. Burch PG, Stanski DR: The role of metabolism and protein binding in thiopental anesthesia. *ANESTHESIOLOGY* 1983; 58:146-52
  20. Gin T, Mainland P, Chan MT, Short TG: Decreased thiopental requirements in early pregnancy. *ANESTHESIOLOGY* 1997; 86:73-8
  21. Steffey EP, Eger EI: The effect of seven vasopressors of halothane MAC in dogs. *Br J Anaesth* 1975; 47:435-8
  22. Eger EI 2nd: MAC, Anesthetic Uptake and Action. Edited by Eger EI 2nd. Baltimore, Williams & Wilkins, 1975, pp 1-25
  23. Chan MT, Gin T: Postpartum changes in the minimum alveolar concentration of isoflurane. *ANESTHESIOLOGY* 1995; 82:1360-3
  24. Campagna JA, Miller KW, Forman SA: Mechanisms of actions of inhaled anesthetics. *N Engl J Med* 2003; 348: 2110-24
  25. Katoh T, Suzuki A, Ikeda K: Electroencephalographic derivatives as a tool for predicting the depth of sedation and anesthesia induced by sevoflurane. *ANESTHESIOLOGY* 1998; 88:642-50
  26. Chin KJ, Yeo SW: Bispectral index values at sevoflurane concentrations of 1% and 1.5% in lower segment cesarean delivery. *Anesth Analg* 2004; 98:1140-4
  27. Jameson LC, Sloan TB: Using EEG to monitor anesthesia drug effects during surgery. *J Clin Monit Comput* 2006; 20:445-72

## ANESTHESIOLOGY REFLECTIONS

### The Schneider Brain Wave Synchronizer

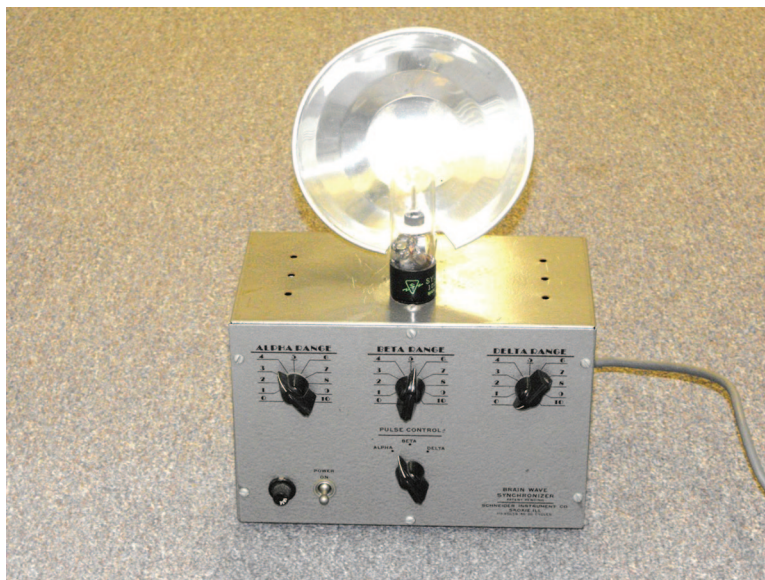

After observing how some radar technicians had become “transfixed” by rhythmic flashing dots on their radar screens, inventor Sidney Schneider designed his Brain Wave Synchronizer (BWS) to hypnotize by visually stimulating subjects at frequencies mimicking those of their alpha, beta, or delta brainwaves. In 1959 Schneider and hypnotist-obstetrician William Kroger, M.D., published their use of the BWS in prenatal classes for thousands of women prior to its use as an “electronic aid for hypnotic induction” during labor and delivery. Four years later, Chicago anesthesiologist Max S. Sadove, M.D., published his work on how BWS-induced hypnosis could reduce anesthetic agent requirements during general anesthesia. By 1994 the BWS would be cited for causing epileptic seizures in a patient. (Copyright © the American Society of Anesthesiologists, Inc. This image appears in color in the *Anesthesiology Reflections* online collection available at [www.anesthesiology.org](http://www.anesthesiology.org).)

George S. Bause, M.D., M.P.H., Honorary Curator, ASA’s Wood Library-Museum of Anesthesiology, Park Ridge, Illinois, and Clinical Associate Professor, Case Western Reserve University, Cleveland, Ohio. [UJYC@aol.com](mailto:UJYC@aol.com).
